# Supplementary material
Source: PubMed Central journal article supplement (PMC9164118)
Supplement: jamaotolaryngolheadnecksurg-e221190-s00.pdf [file jamaotolaryngolheadnecksurg-e221190-s00.pdf]

## Data Sharing Statement

Smahelova. Outcomes After Human Papillomavirus Vaccination in Patients With Recurrent Respiratory Papillomatosis. *JAMA Otolaryngol Head Neck Surg*. Published June 02, 2022. doi:10.1001/jamaoto.2022.1190

### Data

**Data available:** Yes

**Data types:** Deidentified participant data

**How to access data:** We will provide the data upon individual request on email address:

[tachezr@natur.cuni.cz](mailto:tachezr@natur.cuni.cz)

**When available:** With publication

### Supporting Documents

**Document types:** None

### Additional Information

**Who can access the data:** Researchers whose proposed use of the data has been approved.

**Types of analyses:** meta analysis, pooling analysis

**Mechanisms of data availability:** With a signed data access agreement.
